# Supplementary material for: Flow patterns, hotspots, and connectivity of land-derived substances at the sea surface of Curaçao in the southern Caribbean
Source: Copernicus journal article supplement (doi:10.5194/os-21-945-2025), 2025-05-27
Supplement: Supplementary file 2 [file os-21-945-2025-supplement.zip]

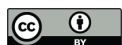

*Supplement of*

**Flow patterns, hotspots, and connectivity of land-derived substances at the sea surface of Curaçao in the southern Caribbean**

**Vesna Bertoneclj et al.**

*Correspondence to:* Vesna Bertoneclj ([vesna.bertoneclj@nioz.nl](mailto:vesna.bertoneclj@nioz.nl))

- [os-21-945-2025-supplement-title-page.pdf](#)
- [FigS1.png](#)
- [FigS2.png](#)
- [FigS3.png](#)
- [FigS4.png](#)
- [FigS5.png](#)
- [FigS6.png](#)
- [SupFig\\_titles.pdf](#)

The copyright of individual parts of the supplement might differ from the article licence.
